# Supplementary material
Source: Springer Nature journal article supplement (https://www.springermedizin.de/resource/supplementary/12886_2008_137_MOESM3_ESM.pdf/9474674)

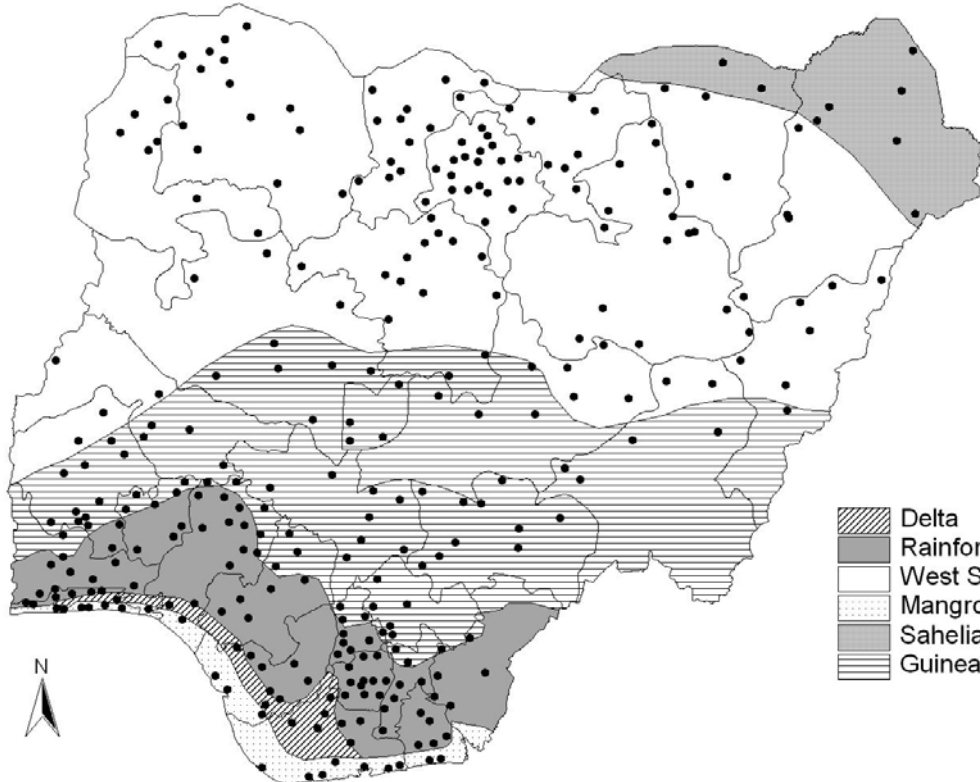

-  Delta
-  Rainforest
-  West Sudanian Savanna
-  Mangroves
-  Sahelian Acacia Savanna
-  Guinean Forest-Savanna Mosaic

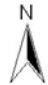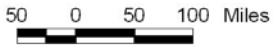

Supplement: MOESM3 [file 9474674]
